# Supplementary material
Source: PubMed Central journal article supplement (PMC6583541)

## Supplementary Online Content

Wang W, Yan W, Müller A, Keel SE, He M. Association of socioeconomic with prevalence of visual impairment and blindness. *JAMA Ophthalmol*. Published online October 19, 2017. doi:10.1001/jamaophthalmol.2017.3449

**eFigure 1.** National Age-Standardized Prevalence of Moderate to Severe Visual Impairment (MSVI) and Blindness in 2010 According to Different Human Development Levels

**eFigure 2.** Scatter Plots of the Country-Level Indices of Absolute and Relative Health Expenditure vs Age-Standardized Prevalence of Moderate to Severe Visual Impairment (MSVI)

**eFigure 3.** Scatter Plots of the Disability-Adjusted Life-Years (DALY) Rate Caused by Vision Loss vs National Level of Human Development Index in 2015

**eFigure 4.** Scatter Plots of the Prevalence of Disability-Adjusted Life-Years (DALY) Rate Caused by Vision Loss vs Gross Domestic Product (GDP) Per Capita in 2015

This supplementary material has been provided by the authors to give readers additional information about their work.

**eFigure 1.** National Age-Standardized Prevalence of Moderate to Severe Visual Impairment (MSVI) and Blindness in 2010 According to Different Human Development Levels

The shaded boxes indicate the inter-quartile range, the horizontal line within the boxes indicates the median, and the limit lines indicate 95% CI.

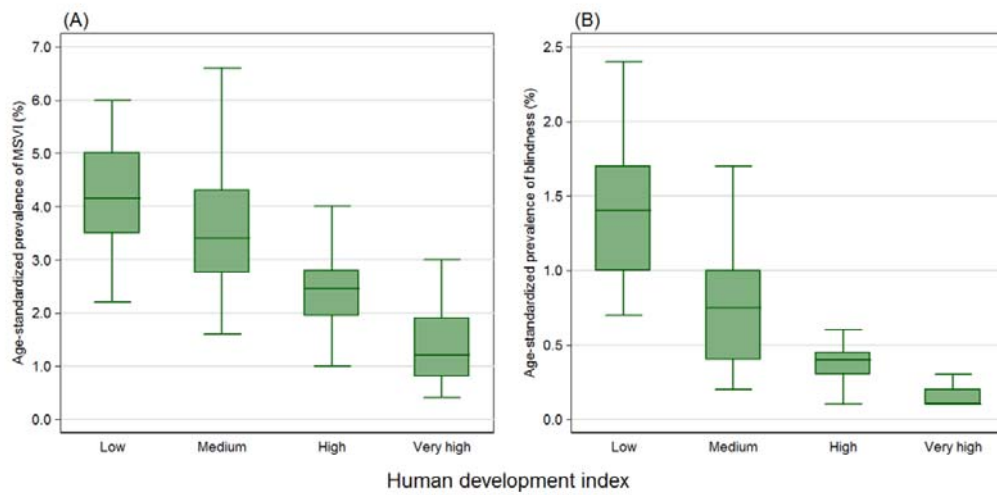

**eFigure 2.** Scatter Plots of the Country-Level Indices of Absolute and Relative Health

Expenditure vs Age-Standardized Prevalence of Moderate to Severe Visual

Impairment (MSVI)

(A) logarithm values of total health expenditure (THE) per capita versus MSVI; (B) THE

as a percentage of GDP (THE /GDP) versus MSVI; (C) Public sector as a share of THE

(Public/THE) versus MSVI; (D) Out-of-pocket health expenditure as a share of THE

(OOP/THE) versus MSVI.

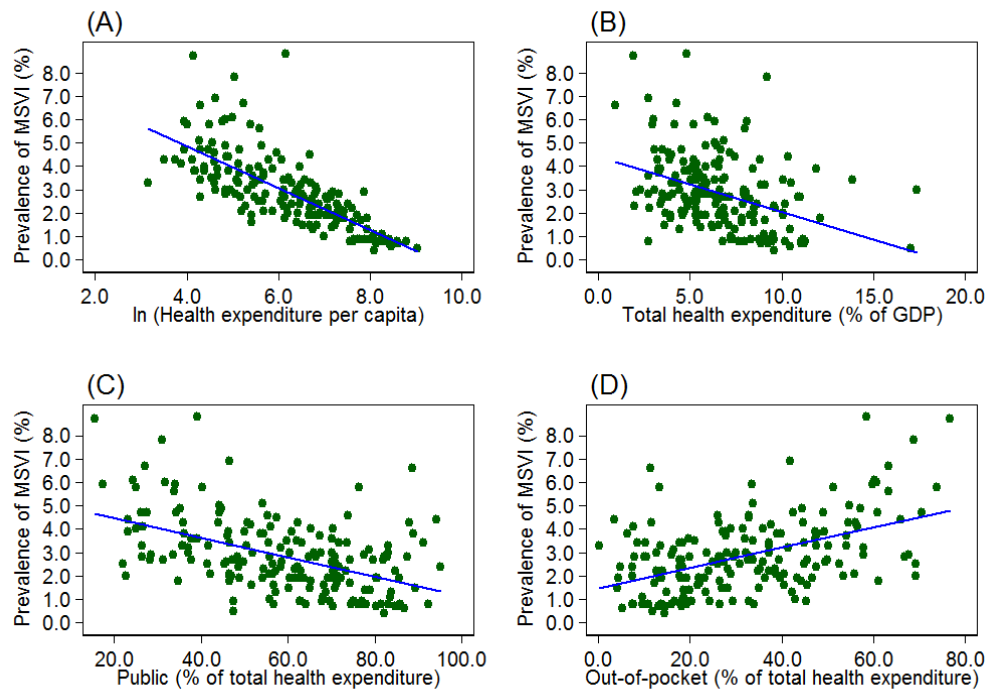

**eFigure 3.** Scatter Plots of the Disability-Adjusted Life-Years (DALY) Rate Caused by Vision Loss vs National Level of Human Development Index in 2015

Red line: linear regression model.

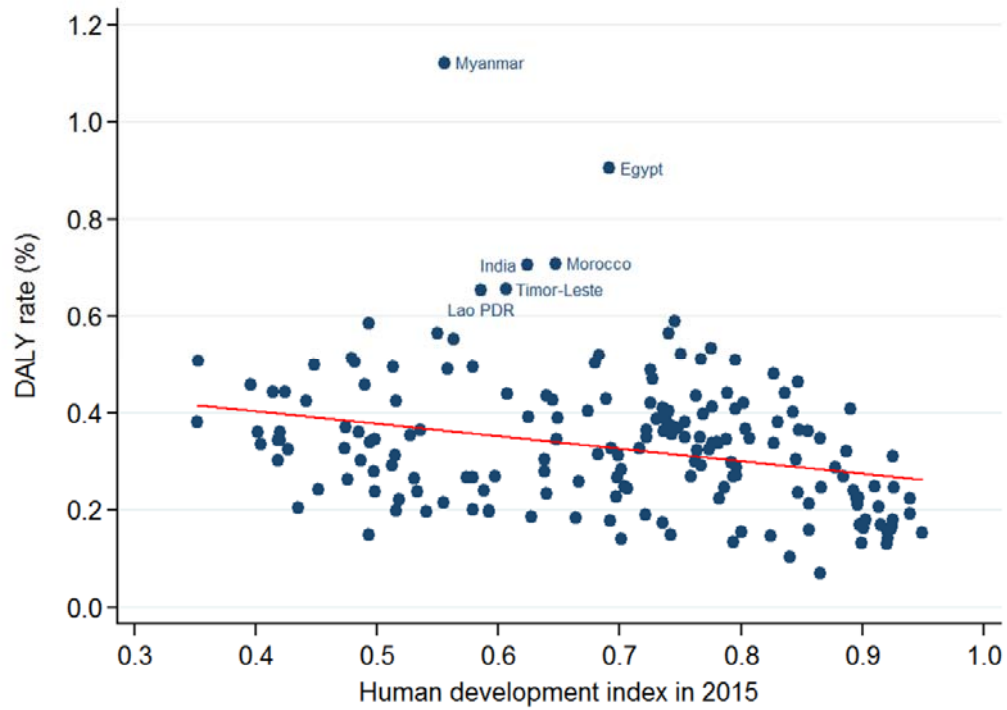

**eFigure 4.** Scatter Plots of the Prevalence of Disability-Adjusted Life-Years (DALY) Rate Caused by Vision Loss vs Gross Domestic Product (GDP) Per Capita in 2015

Red line: linear regression model.

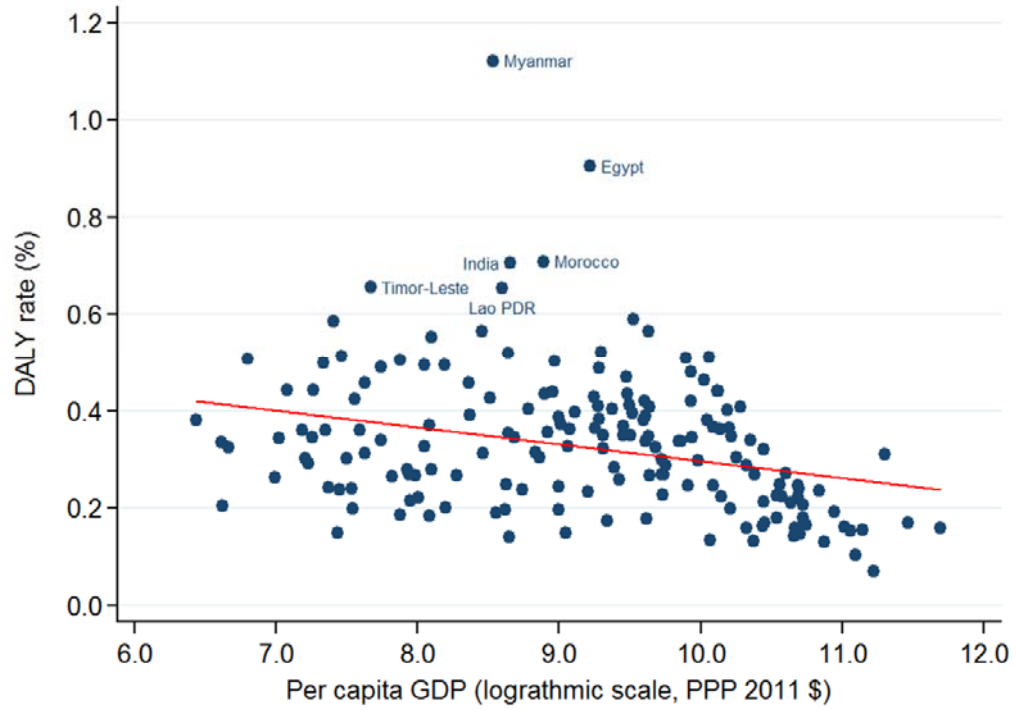

Supplement: jamaophthalmol-135-1295-s001.pdf [file jamaophthalmol-135-1295-s001.pdf]
